# Supplementary material for: Structural analysis of ischemic stroke thrombi: histological indications for therapy resistance
Source: PubMed Central journal article supplement — Haematologica. 2019 May 12;105(2):498–507. doi: 10.3324/haematol.2019.219881 (PMC7012484; doi:10.3324/haematol.2019.219881), 2020-02
Supplement: 2019_219881-Disclosures_and_Contributions.pdf [file 2019_219881-Disclosures_and_Contributions.pdf]

Haematologica  
HAEMATOL/2019/219881  
Version 3

Structural analysis of ischemic stroke thrombi: histological indications  
for therapy resistance

Senna Staessens, Frederik Denorme, Olivier François, Linda  
Desender, Tom Dewaele, Peter Vanacker, Hans Deckmyn, Karen  
Vanhoorelbeke, Tommy Andersson, and Simon F De Meyer

Disclosures: This work was supported by research grants to S.F.D.M. from the Fonds voor Wetenschappelijk Onderzoek – Vlaanderen (FWO) (research grants G.0A86.13, G.0785.17 and 1509216N), the KU Leuven (OT/14/099 and ISP/14/02L2), the Queen Elisabeth Medical Foundation and by the European Union's Horizon 2020 Research and Innovation Program INSIST under grant agreement No 777072. F.D. is a postdoctoral fellow of the FWO (FWO, 12U7818N).

Contributions: S.S., F.D., O.F., H.D., K.V., T.A and S.F.D.M contributed to study concept and design. S.S., F.D., O.F., L.D., T.D, P.V., T.A. and S.F.D.M contributed to data acquisition and analysis. S.S., F.D., O.F., P.V., H.D., K.V., T.A and S.F.D.M. contributed to drafting the manuscript and figures.
